# Supplementary material for: A novel liquid chromatography detector based on a dielectric barrier discharge molecular emission spectrometer with online microwave-assisted hydrolysis for determination of dithiocarbamates
Source: Royal Society of Chemistry journal article supplement (doi:10.1039/c8an00613j), 2018-01-01
Supplement: c8an00613j1.pdf [file c8an00613j1.pdf]

## Supporting Information

### A Novel Liquid Chromatography Detector based Dielectric Barrier Discharge Molecular Emission Spectrometer with Online Microwave-Assisted Hydrolysis for Determination of Dithiocarbamates

*Bingjun Han<sup>1\*</sup>, Ya Li<sup>1</sup>, Bing Qian<sup>1,2,3</sup>, Yan He<sup>1</sup>, Lixu Peng<sup>1,2</sup>, Huamei Yu<sup>3</sup>*

<sup>1</sup> Analysis & Testing Center, Chinese Academy of Tropical Agricultural Sciences,  
Hainan Provincial Key Laboratory of Quality and Safety for Tropical Fruits and  
Vegetables, Haikou, 571101, China

<sup>2</sup> Environment and Plant Protection Institute, Chinese Academy of Tropical  
Agricultural Sciences, Haikou, 571101, China

<sup>3</sup> College of Environment and Plant Protection, Hainan University, Haikou, 570228,  
China

\*Corresponding Author

E-mail: hanbjun@163.com (B. J. Han)

## 1. Emission spectra of the different discharge gas.

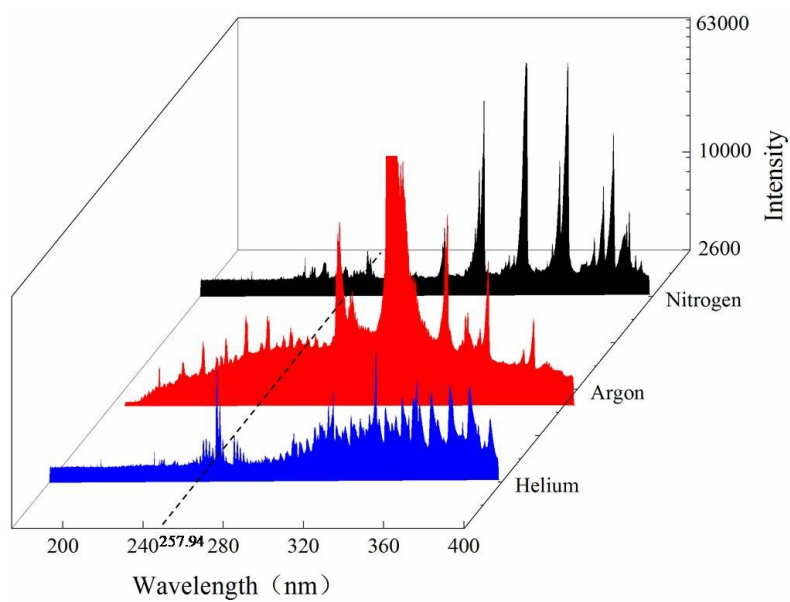

**Figure S1.** Emission spectra of the different discharge gas. Experimental conditions: discharge voltage, 2.6 kV; discharge gas flow rate, 300 mL min<sup>-1</sup>.

## 2. Hydrolysis efficiency of CS<sub>2</sub> conversion from five kinds of DTCs.

**Table S1. Hydrolysis efficiency of CS<sub>2</sub> conversion from five kinds of DTCs (n = 3).**

| Fungicide | Added (mg) | Found (mg)  | Measured yield (%) | Theoretical yield (%) | Hydrolysis efficiency (%) |
|-----------|------------|-------------|--------------------|-----------------------|---------------------------|
| mancozeb  | 1.00       | 0.483±0.027 | 48.3±2.7           | 56.2                  | 85.9 ±4.8                 |
| thiram    | 1.00       | 0.528±0.048 | 52.8±4.8           | 63.2                  | 83.5 ±7.6                 |
| zineb     | 1.00       | 0.491±0.045 | 49.1±4.5           | 55.0                  | 89.3 ±8.2                 |
| propineb  | 1.00       | 0.545±0.036 | 54.5±3.6           | 52.5                  | 104±6.9                   |
| metriam   | 1.00       | 0.525±0.039 | 52.5±3.9           | 55.9                  | 93.9 ±7.0                 |

### 3. Analytical Characteristics of the Proposed Method with Direct Injection.

**Table S2. Analytical Characteristics of the Proposed Method with Direct Injection**

| analyte  | range ( $\mu\text{g mL}^{-1}$ ) <sup>a</sup> | R <sup>2</sup> | RSD(% , n=6) | LOD ( $\mu\text{g mL}^{-1}$ ) |
|----------|----------------------------------------------|----------------|--------------|-------------------------------|
| mancozeb | 1 - 180                                      | 0.997          | 3.2          | 0.10                          |
| thiram   | 2 - 150                                      | 0.990          | 4.7          | 0.20                          |
| zineb    | 1 - 180                                      | 0.991          | 1.8          | 0.05                          |
| propineb | 0.5 - 200                                    | 0.994          | 2.7          | 0.02                          |
| metriam  | 1 - 150                                      | 0.993          | 4.1          | 0.30                          |
